# Supplementary material
Source: PubMed Central journal article supplement (PMC6796864)
Supplement: 41422_2019_174_MOESM1_ESM.pdf [file 41422_2019_174_MOESM1_ESM.pdf]

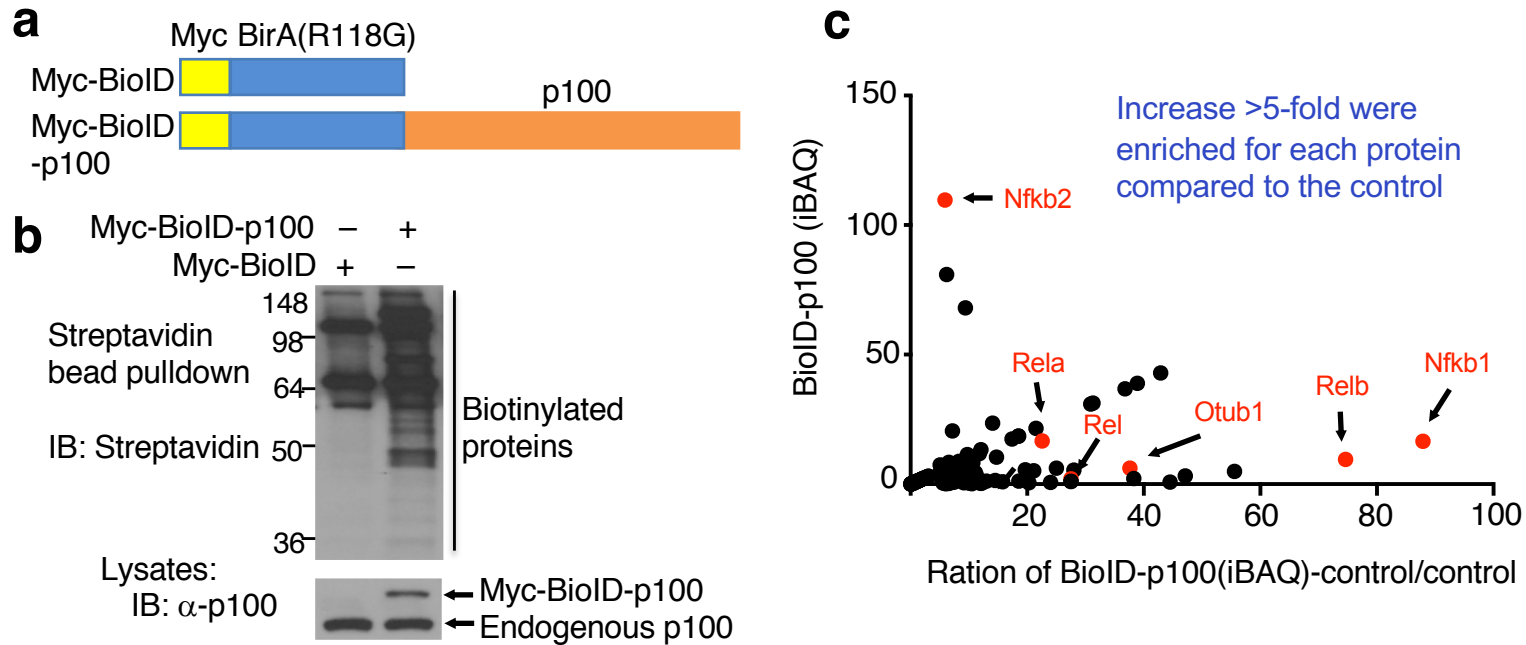

**Fig. S1.** BioID screening of p100-interacting proteins. **a** Schematic of Myc-BioID (Myc-tagged BirA R118G) and Myc-BioID-p100 constructs cloned into the pCLXSN(GFP) retroviral vector. **b** M12 B cells, stably transduced with pCLXSN(GFP)-myc-BioID or pCLXSN(GFP)-myc-BioID-p100, were treated with biotin, and biotinylated proteins were isolated with streptavidin-conjugated beads and detected by streptavidin-HRP immunoblot (IB; upper). Expression of Myc-BioID-p100 and endogenous p100 was detected by immunoblot using anti-p100 (lower). **c** Scatter plot showing iBAQ number of BioID-p100 minus BioID-control/BioID-control ratio and iBAQ number of BioID-p100 in Table S1. iBAQ is relative abundance/AUC of the total gene. In some cases, BioID-control iBAQ number is 0, we used BioID-p100 minus BioID-control as fold changes. The *NF- $\kappa$ B* family members and a novel p100-interacting protein, Otub1, are labeled in red.
