# Supplementary material
Source: PubMed Central journal article supplement (PMC6796864)
Supplement: 41422_2019_174_MOESM3_ESM.pdf [file 41422_2019_174_MOESM3_ESM.pdf]

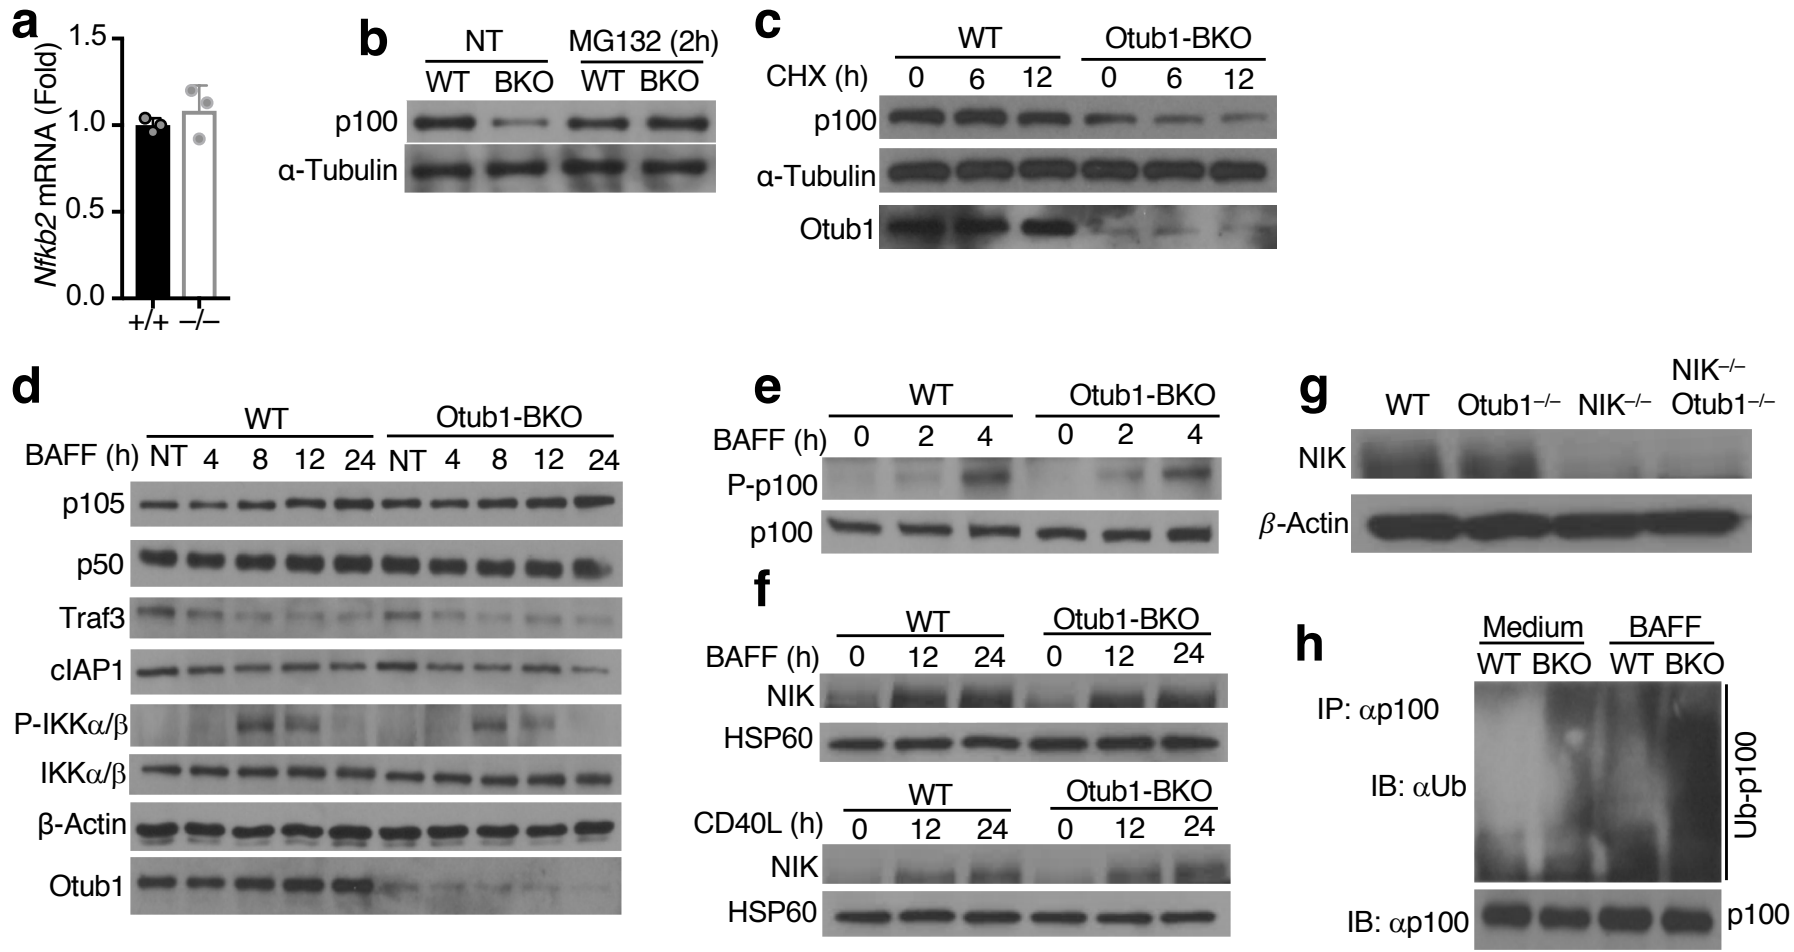

**Fig. S3.** Otub1 deficiency has no effect on noncanonical NF- $\kappa$ B upstream signaling, *Nfkb2* mRNA expression, or p100 translation. **a** qRT-PCR analysis of *Nfkb2* mRNA in untreated *Otub1*<sup>+/+</sup> and *Otub1*<sup>-/-</sup> primary MEFs. **b,c** Immunoblot analysis of the indicated proteins in whole-cell lysates of wildtype (WT) or Otub1-BKO splenic B cells incubated with MG132 for 2 h (**b**) or cycloheximide (CHX) for the indicated time periods (**c**). **d-g** Immunoblot analysis of the indicated phosphorylated (P-) and total proteins in whole-cell lysates of wildtype (WT) or Otub1-BKO B cells stimulated with the indicated inducers (**d-f**) or MEFs stimulated with anti-LT $\beta$ R for 24 h (**g**). **h** p100 ubiquitination (upper) and immunoblot (lower) analysis using whole-cell lysates prepared from wildtype (WT) and *Otub1*-BKO splenic B cells that were incubated with medium or BAFF for 6 h. A proteasome inhibitor, MG132, was added to the culture during the last 2 h of incubation.
