# Supplementary material
Source: PubMed Central journal article supplement (PMC6796864)
Supplement: 41422_2019_174_MOESM4_ESM.pdf [file 41422_2019_174_MOESM4_ESM.pdf]

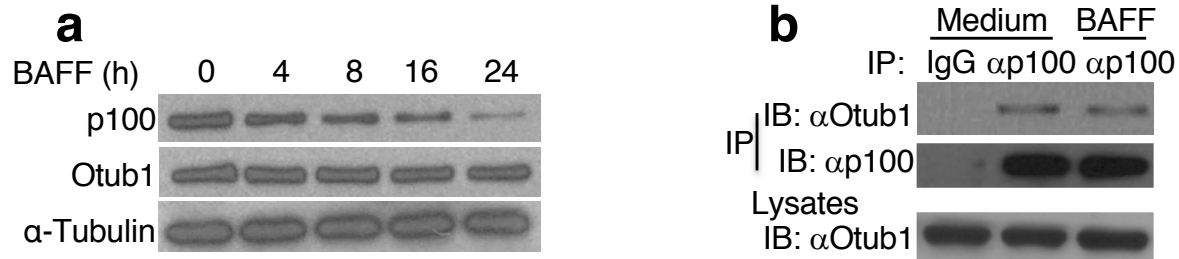

**Fig. S4.** BAFF stimulation does not alter Otub1 expression or interrupt the Otub1/p100 interaction. **a** Immunoblot analysis of the indicated proteins in whole-cell lysates of wildtype splenic B cells treated with BAFF for the indicated time periods. **b** Otub1/p100 coIP assays using whole-cell lysates of wildtype splenic B cells, treated for 2 h with medium or BAFF in the presence of MG132 (upper two panels). IgG was used as a negative control for the p100 IP. Cell lysates were also directly subjected to immunoblot to monitor Otub1 expression level (lower panel).
