# Supplementary material
Source: PubMed Central journal article supplement (PMC6796864)
Supplement: 41422_2019_174_MOESM6_ESM.pdf [file 41422_2019_174_MOESM6_ESM.pdf]

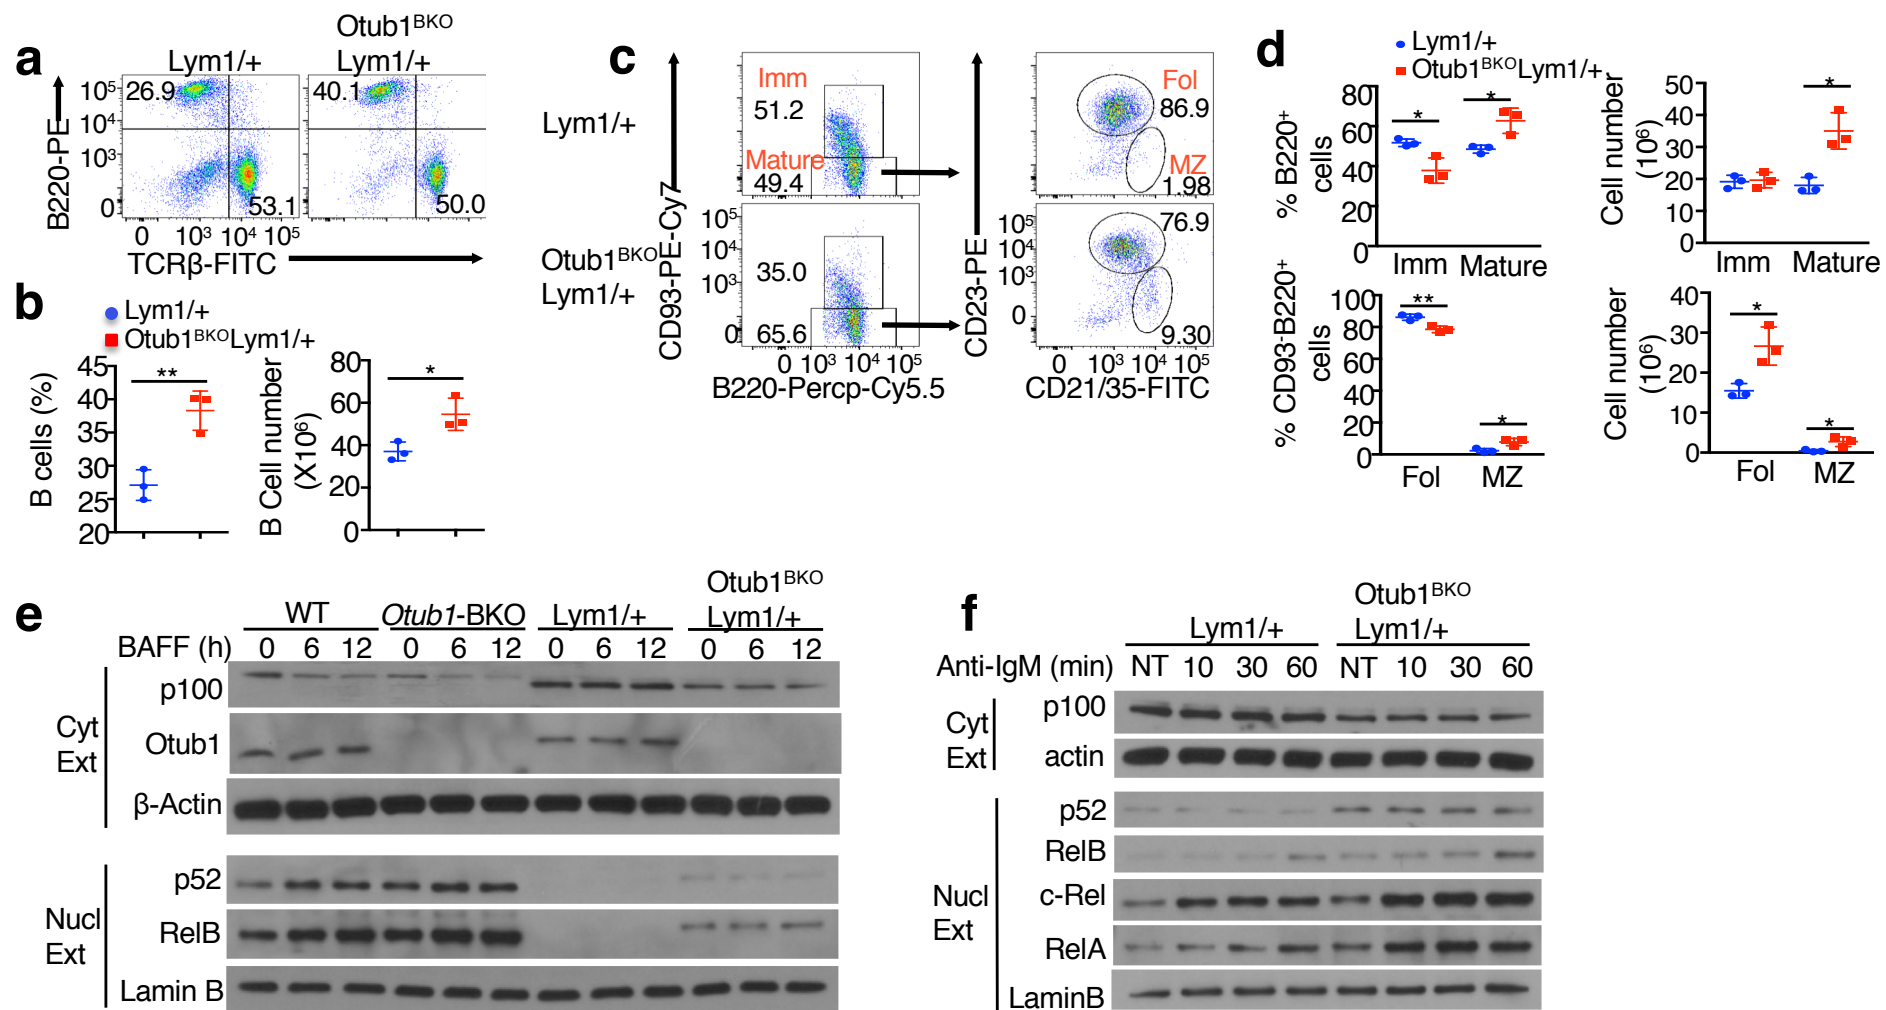

**Fig. S6.** Otub1 deficiency promotes NF- $\kappa$ B activation and B cell hyperplasia independently of p100 C-terminal phosphorylation. **a,b** Flow cytometric analyses of B220<sup>+</sup> B cells and TCR $\beta$ <sup>+</sup> T cells in the spleen of *Nfkb2*<sup>lym1/+</sup> (Lym1/+) or *Otub1*-BKO/*Nfkb2*<sup>lym1/+</sup> double mutant mice (8-10 week old). Data are presented as a representative plot (**a**) and summary graphs of mean  $\pm$  SD values based on multiple mice (**b**, each circle represents a mouse). **c,d** Flow cytometric analyses of immature (Imm, B220<sup>+</sup>CD93<sup>+</sup>) and mature (Mature, B220<sup>+</sup>CD93<sup>-</sup>) B cells as well as follicular (FO, B220<sup>+</sup>CD21<sup>int</sup>CD23<sup>+</sup>) and marginal zone (MZ, B220<sup>+</sup>CD21<sup>hi</sup>CD23<sup>-</sup>) B cells in the spleen of *Nfkb2*<sup>lym1/+</sup> (Lym1/+) or *Otub1*-BKO/*Nfkb2*<sup>lym1/+</sup> double mutant mice (8-10 week old). Data are presented as a representative plot (**c**) and summary graphs (**d**). **e,f** Immunoblot analysis of the indicated proteins using cytoplasmic or nuclear extracts of BAFF-stimulated (**e**) or anti-IgM-stimulated (**f**) splenic B cells from wildtype (WT), *Otub1*-BKO, *Nfkb2*<sup>lym1/+</sup> (Lym1/+) or *Otub1*-BKO/*Nfkb2*<sup>lym1/+</sup> double mutant mice (8-10 week old). Data are representative of 3 independent experiments. P values are determined by two-tailed unpaired t-test. \*P<0.05, \*\*P<0.01.
