# Supplementary material
Source: PubMed Central journal article supplement (PMC6796864)
Supplement: 41422_2019_174_MOESM7_ESM.pdf [file 41422_2019_174_MOESM7_ESM.pdf]

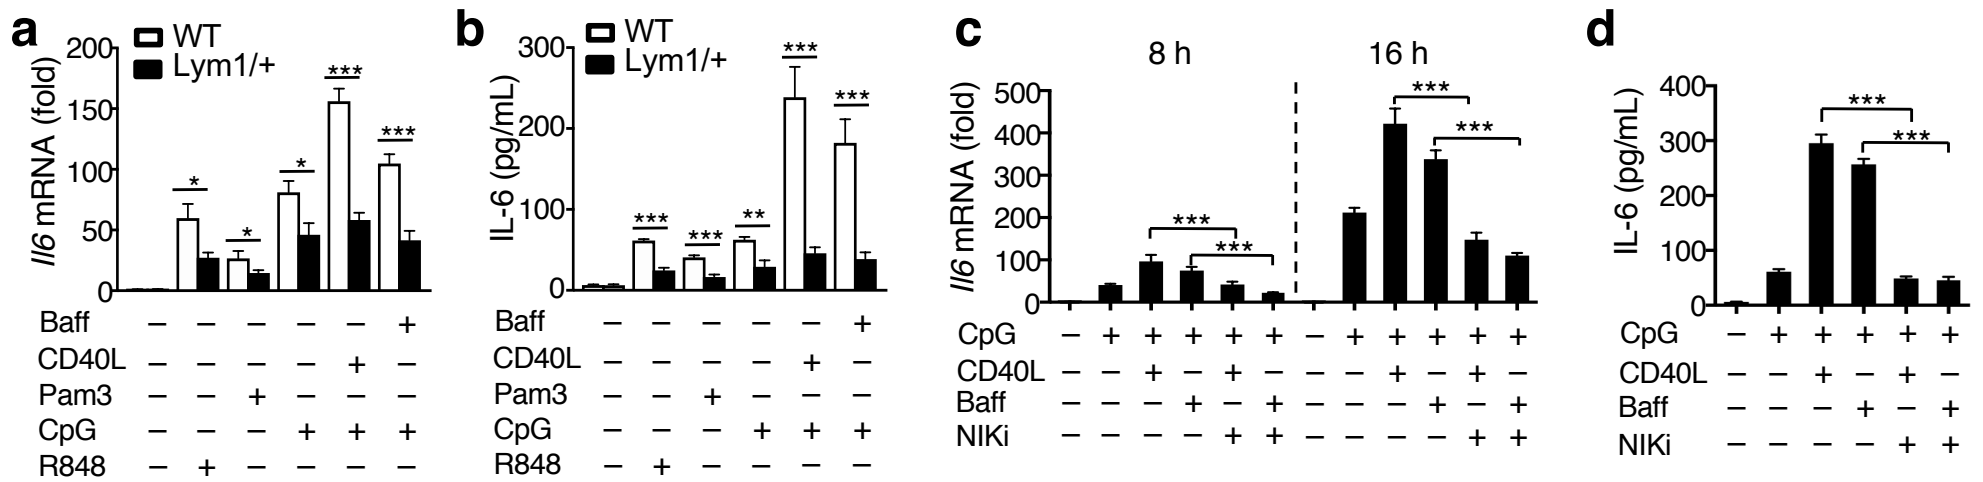

**Fig. S7.** Induction of IL-6 expression in B cells requires the noncanonical NF- $\kappa$ B pathway. **a,b** qRT-PCR (**a**) and ELISA (**b**) analyses of IL-6 expression in wildtype (WT) or *Nfkb2*<sup>lym1/+</sup> splenic B cells that were either not treated (-) or stimulated (+) with the indicated inducers. **c,d** qRT-PCR (**c**) and ELISA (**d**) analysis of IL-6 expression in wildtype splenic B cells that were stimulated (+) with the indicated inducers either in the absence (-) or presence (+) of small molecule inhibitor of NIK (NIK<sub>i</sub>, 5 $\mu$ M)
