# Supplementary material
Source: PubMed Central journal article supplement (PMC6796864)
Supplement: 41422_2019_174_MOESM8_ESM.pdf [file 41422_2019_174_MOESM8_ESM.pdf]

**Table S1. Summary of BioID p100 protein-protein interaction data.**

| GeneID    | GeneSymbol   | Control (iBAQ) | p100 (iBAQ) |
|-----------|--------------|----------------|-------------|
| 18034     | Nfkb2        | 22.3           | 132         |
| 53319     | Nxf1         | 15.6           | 96.5        |
| 22151     | Tubb2a       | 8.1            | 76.2        |
| 100043184 | Gm11703      | 0              | 42.9        |
| 100040929 | Gm10362      | 0              | 38.9        |
| 545423    | Gm13653      | 0              | 36.8        |
| 108143    | Taf9         | 0              | 31.3        |
| 100504872 | LOC100504872 | 0              | 30.9        |
| 12757     | Clta         | 1.8            | 25.4        |
| 23874     | Farsb        | 3.3            | 23.8        |
| 101056140 | LOC101056140 | 0              | 21.5        |
| 57230     | Sap30bp      | 0              | 18.5        |
| 639905    | LOC639905    | 0              | 18.5        |
| 19697     | Rela         | 0.77           | 17.4        |
| 12055     | Bcl7c        | 0              | 17.4        |
| 18033     | Nfkb1        | 0.19           | 16.7        |
| 20589     | Ighmbp2      | 1.2            | 14.5        |
| 80886     | Senp3        | 1.3            | 12.7        |
| 14674     | Gna13        | 0              | 11.8        |
| 70885     | Ints10       | 0.76           | 11.2        |
| 140858    | Wdr5         | 1.2            | 10          |
| 19646     | Rbbp4        | 0              | 9.9         |
| 67075     | Magt1        | 1.5            | 9.9         |
| 19698     | Relb         | 0.13           | 9.7         |
| 18481     | Pak3         | 1.8            | 9.2         |
| 26399     | Map2k6       | 0.86           | 9.2         |
| 100502766 | Kifc1        | 1.4            | 8.5         |
| 18181     | Nrf1         | 1.1            | 7.7         |
| 56031     | Ppie         | 0.26           | 6.5         |
| 107260    | Otub1        | 0.17           | 6.4         |
| 14360     | Fyn          | 0              | 6.3         |
| 19684     | Rdx          | 0.78           | 6.3         |
| 19345     | Rab5c        | 0.62           | 6.2         |
| 17425     | Foxk1        | 1.1            | 5.9         |
| 67288     | Sreklip1     | 0.3            | 5.9         |
| 13684     | Eif4e        | 1.1            | 5.6         |
| 74125     | Armc8        | 0.2            | 5.6         |
| 13177     | Eci1         | 0.26           | 5.5         |
| 28035     | Usp39        | 0.82           | 5.1         |
| 22350     | Ezr          | 0.63           | 5.1         |
| 67052     | Ndc80        | 0.09           | 5           |

|        |               |      |     |
|--------|---------------|------|-----|
| 56440  | Snx1          | 0.55 | 5   |
| 17698  | Msn           | 0.62 | 5   |
| 11836  | Araf          | 0.44 | 4.9 |
| 13728  | Mark2         | 0.95 | 4.8 |
| 98878  | Ehd4          | 0.58 | 4.7 |
| 104570 | Smek2         | 0.74 | 4.6 |
| 15982  | Ifrd1         | 0.71 | 4.3 |
| 16151  | Ikbkg         | 0.4  | 3.8 |
| 230082 | Nol6          | 0.45 | 3.7 |
| 15512  | Hspa2         | 0.5  | 3.5 |
| 16561  | Kif1b         | 0.07 | 3.3 |
| 214498 | Cdc73         | 0.29 | 3.3 |
| 228994 | Ythdf1        | 0    | 3.1 |
| 16554  | Kif13b        | 0    | 3.1 |
| 70527  | Stambp        | 0.5  | 3   |
| 69906  | Slc25a32      | 0    | 2.9 |
| 66645  | Pspc1         | 0.53 | 2.9 |
| 22629  | Ywhah         | 0.28 | 2.8 |
| 22352  | Vim           | 0    | 2.7 |
| 210992 | Lpcat1        | 0    | 2.6 |
| 619605 | Zcchc17       | 0    | 2.6 |
| 20841  | Zfp143        | 0    | 2.4 |
| 72313  | Fryl          | 0.06 | 2.3 |
| 65961  | Utp3          | 0.34 | 2.3 |
| 101489 | Ric8          | 0.33 | 2.2 |
| 67382  | Brd3          | 0.31 | 2.2 |
| 19696  | Rel           | 0.08 | 2.2 |
| 11518  | Add1          | 0.22 | 2.2 |
| 23897  | Hax1          | 0.41 | 2.2 |
| 70415  | 2610018G03Rik | 0    | 2.2 |
| 98752  | Fcrla         | 0    | 2.2 |
| 13358  | Slc25a1       | 0    | 2.1 |
| 27275  | Nufip1        | 0.25 | 2.1 |
| 20514  | Slc1a5        | 0.31 | 2   |
| 20112  | Rps6ka2       | 0    | 2   |
| 15194  | Htt           | 0.19 | 2   |
| 19246  | Ptpn1         | 0.26 | 2   |
| 17448  | Mdh2          | 0    | 2   |
| 234729 | Vac14         | 0.3  | 1.9 |
| 321006 | Vprbp         | 0.23 | 1.9 |
| 71952  | 2410016O06Rik | 0.34 | 1.9 |
| 18648  | Pgam1         | 0    | 1.9 |
| 53817  | Ddx39b        | 0    | 1.7 |
| 81702  | Ankrd17       | 0.24 | 1.7 |

|        |           |      |      |
|--------|-----------|------|------|
| 17686  | Msh3      | 0.17 | 1.7  |
| 70683  | Utp20     | 0.22 | 1.6  |
| 11669  | Aldh2     | 0    | 1.6  |
| 13429  | Dnm1      | 0.24 | 1.6  |
| 74022  | Glyr1     | 0    | 1.6  |
| 26754  | Cops5     | 0    | 1.6  |
| 266781 | Snx17     | 0.11 | 1.6  |
| 14688  | Gnb1      | 0    | 1.6  |
| 207375 | Fam120c   | 0    | 1.5  |
| 11364  | Acadm     | 0.26 | 1.5  |
| 207352 | Sec23ip   | 0.21 | 1.5  |
| 20591  | Kdm5c     | 0.24 | 1.4  |
| 319653 | Slc25a40  | 0    | 1.4  |
| 11766  | Ap1g2     | 0    | 1.3  |
| 14732  | Gpam      | 0.1  | 1.3  |
| 30853  | Mlf2      | 0.07 | 1.3  |
| 57783  | Tnip1     | 0    | 1.3  |
| 634555 | LOC634555 | 0    | 1.2  |
| 22589  | Atrx      | 0.17 | 1.1  |
| 66335  | Atp6v1c1  | 0.18 | 1.1  |
| 320560 | Dennd5b   | 0    | 1.1  |
| 228355 | Madd      | 0    | 1.1  |
| 208606 | Rsrc2     | 0.2  | 1.1  |
| 224824 | Pex6      | 0.04 | 1.1  |
| 18115  | Nnt       | 0.04 | 1.1  |
| 77038  | Arfgap2   | 0    | 1.1  |
| 12333  | Capn1     | 0.15 | 1    |
| 214627 | Papd5     | 0    | 1    |
| 78928  | Pigt      | 0    | 1    |
| 66354  | Snw1      | 0    | 1    |
| 76580  | Mib2      | 0.13 | 0.98 |
| 20602  | Ncor2     | 0.16 | 0.96 |
| 77045  | Bcl7a     | 0.06 | 0.95 |
| 59024  | Med12     | 0.16 | 0.93 |
| 338337 | Cog3      | 0.02 | 0.89 |
| 78913  | Ltn1      | 0.12 | 0.85 |
| 57815  | Spata5    | 0.12 | 0.81 |
| 19046  | Ppp1cb    | 0    | 0.81 |
| 224045 | Eif2b5    | 0.08 | 0.74 |
| 58202  | Nelfb     | 0.03 | 0.72 |
| 15183  | Hdac3     | 0    | 0.72 |
| 67500  | Ccar1     | 0    | 0.71 |
| 53313  | Atp2a3    | 0    | 0.65 |
| 237943 | Gpatch8   | 0.07 | 0.64 |

|           |          |      |      |
|-----------|----------|------|------|
| 56705     | Ranbp9   | 0    | 0.63 |
| 101540    | Prkd2    | 0.03 | 0.61 |
| 16897     | Llg1l    | 0    | 0.6  |
| 14827     | Pdia3    | 0    | 0.59 |
| 225326    | Pik3c3   | 0    | 0.56 |
| 270627    | Taf1     | 0.05 | 0.52 |
| 22084     | Tsc2     | 0    | 0.52 |
| 72584     | Cul4b    | 0.09 | 0.5  |
| 108037    | Shmt2    | 0.05 | 0.5  |
| 75415     | Arhgap12 | 0.04 | 0.49 |
| 237222    | Ofd1     | 0    | 0.42 |
| 269610    | Chd5     | 0    | 0.42 |
| 73288     | Ccdc132  | 0.06 | 0.38 |
| 544963    | Iqgap2   | 0    | 0.38 |
| 12704     | Cit      | 0    | 0.38 |
| 68117     | Apool    | 0    | 0.37 |
| 18671     | Abcb1a   | 0    | 0.37 |
| 66897     | Naa16    | 0.03 | 0.36 |
| 381290    | Atp2b4   | 0.05 | 0.33 |
| 99683     | Sec24b   | 0.05 | 0.32 |
| 99371     | Arfgef2  | 0.05 | 0.3  |
| 55936     | Ctps2    | 0    | 0.3  |
| 100502841 | Epg5     | 0    | 0.28 |
| 227723    | Prrc2b   | 0.04 | 0.24 |
| 71701     | Pnpt1    | 0    | 0.22 |
| 243842    | Gltscr1  | 0    | 0.22 |
| 18704     | Pik3c2a  | 0.02 | 0.21 |
| 16549     | Khsrp    | 0    | 0.18 |
| 216345    | Zfc3h1   | 0    | 0.17 |
| 14000     | Drosha   | 0    | 0.16 |
| 320011    | Uggt1    | 0    | 0.12 |
| 66926     | Trmt6    | 0    | 0.11 |
| 404710    | Iqgap3   | 0    | 0.11 |
| 56784     | Ralgapa1 | 0    | 0.05 |
