# Supplementary material
Source: PubMed Central journal article supplement (PMC6796864)
Supplement: 41422_2019_174_MOESM9_ESM.pdf [file 41422_2019_174_MOESM9_ESM.pdf]

**Table S2. Gene-specific primers used in genotyping experiments:**

| Gene                   | Forward primer (5'-3')  | Reverse primer (5'-3')  |
|------------------------|-------------------------|-------------------------|
| <i>Otub1</i> WT allele | ACTTGACCTTGGACAAGATGGAG | TGAAGCCCTAGCAACCTCAAG   |
| <i>Otub1</i> KO allele | GAGATGGCGCAACGCAATTAATG | TACCTGTGTGACCACCTGAAG   |
| <i>NIK</i>             | ATCAAGCTGGCCCTTAACCT    | CAAGGAGTTCTTGTTTCCCAG   |
| <i>Lym1</i>            | CTGCTGAAAGGTCCTGAGAC    | CATTCAGTGCACCTGAGGCTG   |
| CD19-Cre WT            | AGAGGGAGGCAATGTTGTGC    | GTCCAGGTCCCTGACGTCTG    |
| CD19-Cre KO            | AGAGGGAGGCAATGTTGTGC    | GACGATGAAGCATGTTTAGCTGG |
| Rosa26-CreER WT        | AAAGTCGCTCTGAGTTGTTAT   | GGAGCGGGAGAAATGGATATG   |
| Rosa26-CreER KO        | AAAGTCGCTCTGAGTTGTTAT   | CCTGATCCTGGCAATTTTCG    |
