# Supplementary material
Source: PubMed Central journal article supplement (PMC6796864)
Supplement: 41422_2019_174_MOESM10_ESM.pdf [file 41422_2019_174_MOESM10_ESM.pdf]

**Table S3. Reagent or Resource**

| <b>Reagent or Resource</b>                                     | <b>Source</b>                        | <b>Identifier</b>     |
|----------------------------------------------------------------|--------------------------------------|-----------------------|
| <b>Antibodies</b>                                              |                                      |                       |
| Rabbit polyclonal Anti-p100/p52                                | Cell Signaling Technology            | Cat# 4882             |
| Rabbit polyclonal Anti-p100 (N)                                | National Cancer Institute            | Antisera Number: 1267 |
| Rabbit polyclonal Anti-p100 (C)                                | National Cancer Institute            | Antisera Number: 1310 |
| Rat Anti-Mouse lymphotoxin-beta receptor (5G11b)               | Bio-Rad                              | Cat# MCA2244          |
| Rabbit mAb Anti-p105/p50 (D7H5M)                               | Cell Signaling Technology            | Cat# 12540            |
| Rabbit mAb Anti-p65 (D14E12)                                   | Cell Signaling Technology            | Cat# 8242             |
| Rabbit polyclonal Anti-RelB (C-19)                             | Santa Cruz                           | Cat# SC-226           |
| Rabbit polyclonal Anti-c-Rel (C)                               | Santa Cruz                           | Cat# SC-71            |
| Rabbit mAb Anti-OTUB1                                          | Abcam                                | Cat# ab175200         |
| Rabbit polyclonal Anti-TRAF3 (H-122)                           | Santa Cruz                           | Cat# SC-1828          |
| Rabbit polyclonal Anti-TRAF2 (C-20)                            | Santa Cruz                           | Cat# SC-876           |
| Rabbit polyclonal Anti-NIK                                     | Cell Signaling Technology            | Cat# 4994             |
| Rabbit mAb Anti-I $\kappa$ B $\alpha$ (44D4)                   | Cell Signaling Technology            | Cat# 4812             |
| Mouse mAb Anti-Ub (P4D1)                                       | Santa Cruz                           | Cat# SC-8017          |
| Rabbit mAb Anti-Ubiquitin, Lys48-Specific (Apu2)               | Millipore                            | Cat# 05-1307          |
| Mouse mAb Anti-HSP60 (H-1)                                     | Santa Cruz                           | Cat# SC-13115         |
| Rabbit polyclonal Anti- $\alpha$ -Tubulin                      | Cell Signaling Technology            | Cat# 2144             |
| Mouse mAb Anti- $\beta$ -Actin (AC-74)                         | Sigma-Aldrich                        | Cat# A2228            |
| Goat polyclonal Anti-Lamin B (C-20)                            | Santa Cruz                           | Cat# SC-6216          |
| Mouse mAb Anti-HA (12CA5)                                      | Roche                                | Cat# 11583816001      |
| Anti-HA-HRP (3F10)                                             | Roche                                | Cat# 12013819001      |
| Mouse mAb Anti-Flag M2                                         | Sigma-Aldrich                        | Cat# F3165            |
| Anti-Flag M2-HRP                                               | Sigma-Aldrich                        | Cat# A8592            |
| Anti-Streptavidin-HRP                                          | Thermo Fisher Scientific             | Cat# 21126            |
| Polyclonal Goat Anti-Mouse IgM, $\mu$ chain specific           | Jackson Immuno Research Laboratories | Cat# 115-066-020      |
| HRP-conjugated Goat Anti-Rabbit                                | Jackson Immuno Research Laboratories | Cat# 111-035-047      |
| HRP-conjugated Rabbit Anti-Mouse                               | Jackson Immuno Research Laboratories | Cat# 315-035-047      |
| HRP-conjugated Donkey Anti-Goat                                | Jackson Immuno Research Laboratories | Cat# 705-035-003      |
| PerCP-Cy <sup>TM</sup> 5.5 Rat Anti-Mouse CD45R/B220 (RA3-6B2) | BD Pharmingen <sup>TM</sup>          | Cat# 561101           |
| APC Rat Anti-Mouse IgM (II/41)                                 | BD Pharmingen <sup>TM</sup>          | Cat# 550676           |
| FITC Rat Anti-Mouse CD21/CD35 (7G6)                            | BD Pharmingen <sup>TM</sup>          | Cat# 561769           |
| APC Rat Anti-Mouse CD138 (281-2)                               | BD Pharmingen <sup>TM</sup>          | Cat# 561705           |
| FITC Hamster Anti-Mouse CD95 (Jo2)                             | BD Pharmingen <sup>TM</sup>          | Cat# 554257           |
| FITC Rat Anti-Mouse IgA                                        | BD Pharmingen <sup>TM</sup>          | Cat# 559354           |

|                                                         |                          |                       |
|---------------------------------------------------------|--------------------------|-----------------------|
| eFluor 450 Rat Anti-Mouse IgD (11-26c)                  | eBioscience™             | Cat# 48-5993-82       |
| PE-Cyanine7 Rat Anti-Mouse CD93 (AA4.1)                 | eBioscience™             | Cat# 25-5892-82       |
| PE Rat Anti-Mouse CD23 (B3B4)                           | eBioscience™             | Cat# 12-0232-82       |
| PE Rat Anti-Mouse CD86 (B7-2)                           | eBioscience™             | Cat# 12-0862-82       |
| PE Hamster Anti-Mouse CD80 (B7-1)                       | eBioscience™             | Cat# 12-0801-82       |
| PE Rat Anti-Mouse CD275 (B7-H2)                         | eBioscience™             | Cat# 12-5985-82       |
| PE Rat Anti-Mouse CD45R (B220) (RA3-6B2)                | eBioscience™             | Cat# 12-0452-82       |
| FITC Hamster Anti-TCR beta (H57-597)                    | eBioscience™             | Cat# MA5-17652        |
| eFluor 450 Rat Anti-Mouse GL7 (GL-7)                    | eBioscience™             | Cat# 48-5902-80       |
| Alexa Fluor 488 Goat anti-Mouse IgG, IgM, IgA (H+L)     | Thermo Fisher Scientific | Cat# A-10667          |
| APC- Cyanine7 Rat anti-Mouse/Human CD45R/B220 (RA3-6B2) | BioLegend                | Cat# 103224           |
| Alexa Fluor® 488 Rat anti-mouse I-A/I-E (M5/114.15.2)   | BioLegend                | Cat# 107616           |
| Polyclonal Goat Anti-Mouse Ig                           | SouthernBiotech          | Cat# 1010-01          |
| Polyclonal Goat Anti-Mouse IgA-HRP                      | SouthernBiotech          | Cat# 1040-05          |
| Polyclonal Goat Anti-Mouse IgM-HRP                      | SouthernBiotech          | Cat# 1021-05          |
| Polyclonal Goat Anti-Mouse IgG1-HRP                     | SouthernBiotech          | Cat# 1071-05          |
| Polyclonal Goat Anti-Mouse IgG2a-HRP                    | SouthernBiotech          | Cat# 1081-05          |
| Polyclonal Goat Anti-Mouse IgG2b-HRP                    | SouthernBiotech          | Cat# 1091-05          |
| IL-6 Monoclonal Antibody (MP5 20F3)                     | eBioscience™             | Cat# AMC0862          |
| IL-6 Monoclonal Antibody (MP5-32C11), Biotin            | eBioscience™             | Cat# 13-7062-81       |
| <i>In Vivo</i> MAb anti-mouse IL-6 (MP5-20F3)           | Bio X cell               | BE0046                |
| <i>In Vivo</i> MAb rat IgG1 isotype control (HRPN)      | Bio X cell               | BE0088                |
|                                                         |                          |                       |
| <b>Chemicals, Peptides, and Recombinant Proteins</b>    |                          |                       |
| Puromycin                                               | Sigma-Aldrich            | Cat# P8833            |
| Recombinant Human BAFF                                  | Thermo Fisher Scientific | Cat# PHC1674          |
| Recombinant Murine sCD40 Ligand                         | Peptotech                | Cat# 315-15           |
| MG-132                                                  | Sigma-Aldrich            | Cat# M7449            |
| Pam3CSK4                                                | Enzo                     | Cat# ALX-165-066-M002 |
| R848                                                    | InvivoGen                | Cat# tlr1-r848        |
| CpG 2216                                                | Sigma-Aldrich            | N/A                   |

|                                               |                               |                                                                     |
|-----------------------------------------------|-------------------------------|---------------------------------------------------------------------|
| LPS                                           | Sigma-Aldrich                 | Cat# L8654                                                          |
| NIK inhibitor-SMI1                            | Genetech                      | Cat# 13000991330                                                    |
| Mouse IL-6 Standards Recombinant protein      | eBioscience™                  | Cat# 29-8061-65                                                     |
| TRIzol reagent                                | Thermo Fisher Scientific      | Cat# 15596018                                                       |
| 4-hydroxy-tamoxifen                           | Sigma-Aldrich                 | Cat# 94873                                                          |
| Biotin                                        | Sigma-Aldrich                 | Cat# B4501                                                          |
| <b>Critical Commercial Assays</b>             |                               |                                                                     |
| Plasmid Mini Kit                              | Qiagen                        | Cat# 12125                                                          |
| QuikChange II Site-directed mutagenesis kit   | Agilent                       | Cat# 200522                                                         |
| Dynabeads™ MyOne™ Streptavidin C1             | Thermo Fisher Scientific      | Cat# 65002                                                          |
| iQ™ SYBR Green Supermix                       | Bio-Rad                       | Cat# 1708885                                                        |
| M-MLV Reverse Transcriptase                   | Thermo Fisher Scientific      | Cat# 28025013                                                       |
| CD45R (B220) MicroBeads, mouse                | Miltenyi Biotec               | Cat# 130-049-501                                                    |
| CD4 (L3T4) MicroBeads, mouse                  | Miltenyi Biotec               | Cat# 130-117-043                                                    |
| Mouse Anti-dsDNA Ig ELISA Kit                 | Alpha Diagnostic              | Cat# 5110                                                           |
| Mouse Anti-ANA ELISA Kit                      | Alpha Diagnostic              | Cat# 5210                                                           |
| <b>Oligonucleotides</b>                       |                               |                                                                     |
| Table S2, S4 and S5                           |                               |                                                                     |
| <b>Recombinant DNA</b>                        |                               |                                                                     |
| Methods-Plasmid                               |                               |                                                                     |
| <b>Experimental Models: Cell Lines</b>        |                               |                                                                     |
| HEK293 cells                                  | ATCC                          | Cat# CRL-1573                                                       |
| M12.4.1 B cells                               | Provided by Dr Gail A. Bishop | N/A                                                                 |
| <b>Experimental Models: Organisms/Strains</b> |                               |                                                                     |
| Methods-Mice                                  |                               |                                                                     |
| <b>Software and Algorithms</b>                |                               |                                                                     |
| GraphPad Prism                                | GraphPad Software, Inc.       | <a href="https://www.graphpad.com/">https://www.graphpad.com/</a>   |
| FlowJo software                               | FlowJo, LLC and Illumina, Inc | <a href="https://www.flowjo.com/">https://www.flowjo.com/</a>       |
| ImageJ                                        | NIH                           | <a href="https://imagej.nih.gov/ij/">https://imagej.nih.gov/ij/</a> |
