# Supplementary material
Source: PubMed Central journal article supplement (PMC6796864)
Supplement: 41422_2019_174_MOESM11_ESM.pdf [file 41422_2019_174_MOESM11_ESM.pdf]

**Table S4. Gene-specific primers used in site-directed mutagenesis**

---

| <b>Gene</b>          | <b>Forward primer (5'-3')</b>              | <b>Reverse primer (5'-3')</b>              |
|----------------------|--------------------------------------------|--------------------------------------------|
| hOtub1(D88A)         | TAGAAACAGTTGCCGGCAGGCCTGGTCTTGC            | GCAAGACCAGGCCTGCCGGCAACTGTTTCTA            |
| hOtub1(H265A)        | CTTCTCTACCGGCCTGGAGCCTACGATATCCT<br>CTACAA | TTGTAGAGGATATCGTAGGCTCCAGGCCGGTA<br>GAGAAG |
| hOtub1(C91SD8<br>8A) | GCCCGATAGAAACTGTTGCCGGCAGGCCTGG<br>TCTT    | AAGACCAGGCCTGCCGGCAACAGTTTCTATCG<br>GGC    |
| hOtub1( $\Delta$ N)  | ATGGCGGCGGAGGAACTGGTGTCAGAGC               | GCTCTGACACCAGTTCCTCCGCCGCCAT               |

---
