# Supplementary material
Source: PubMed Central journal article supplement (PMC6796864)
Supplement: 41422_2019_174_MOESM12_ESM.pdf [file 41422_2019_174_MOESM12_ESM.pdf]

**Table S5. Gene-specific primers used in qRT-PCR experiments:**

| <b>Gene</b>    | <b>Forward primer (5'-3')</b> | <b>Reverse primer (5'-3')</b> |
|----------------|-------------------------------|-------------------------------|
| $\beta$ -actin | GGTACCACCATGTACCCAGG          | GAAAGGGTGTAACGCAGC            |
| CXCL13         | CAGAATGAGGCTCAGCACAGC         | CAGAATACCGTGGCCTGGAG          |
| MADCAM-1       | GAGCAAGAAGAGGAGATACAAGAG      | TGGTGACCTGGCAGTGAAG           |
| CCL21          | AGACTCAGGAGCCCAAAGCA          | GTTGAAGCAGGGCAAGGGT           |
| CCL19          | ACCAAGGACCAGAAGAGAGGA         | ACTCACATCGACTCTCTAGG          |
| Nfkb2          | AATCTGGGTGTCCTGCATGTAA        | AAGGAAAGCTGAGAAGCGTAGC        |
| TNF            | CATCTTCTCAAATTCGAGTGACAA      | CCAGCTGCTCCTCCACTTG           |
| MIP-2          | AAAGTTTGCCTTGACCCTGA          | TCCAGGTCAGTTAGCCTTGC          |
| VCAM-1         | TCGGGCGAAAAATAGTCCTT          | CCGGCATATACGAGTGTGAA          |
| OTUB1          | GTAGCGACTCCGAAGGTGTT          | ACCAGAGGATTCTGCACAGC          |
